# Supplementary material
Source: PubMed Central journal article supplement (PMC9107192)

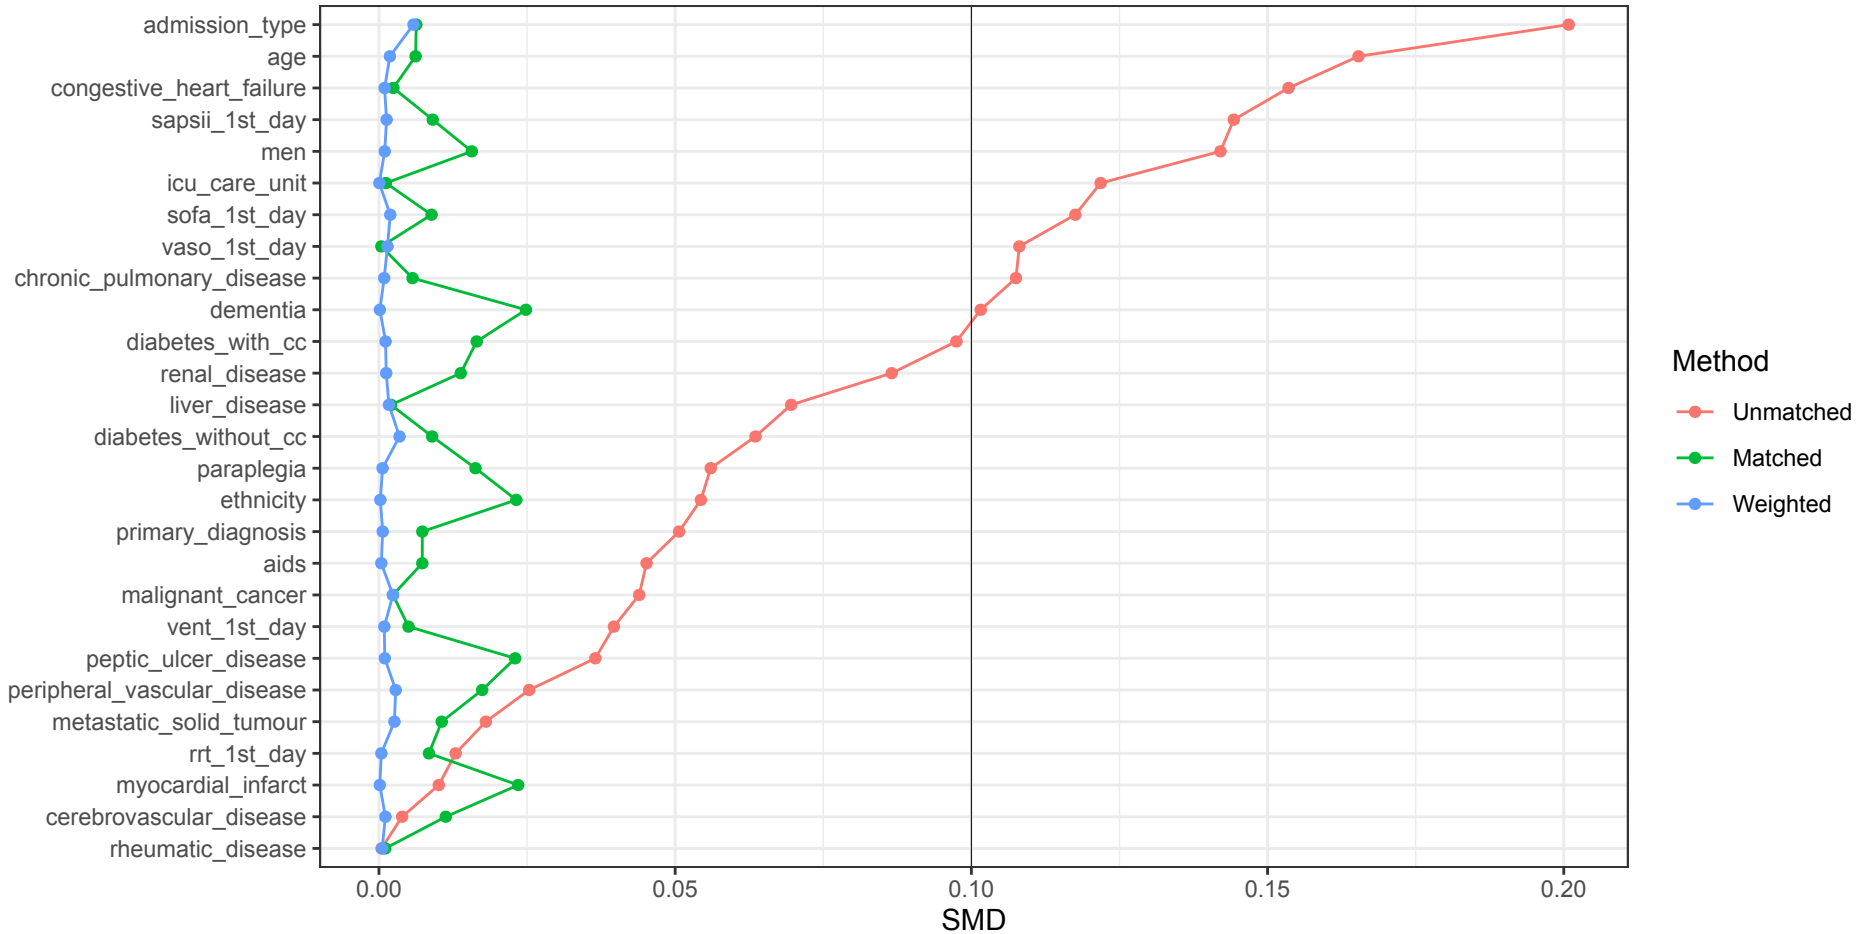

Supplement: 12967_2022_3401_MOESM1_ESM.pdf [file 12967_2022_3401_MOESM1_ESM.pdf]
